## **Structural Basis for the Calmodulin-Mediated Activation of eEF-2K**

Andrea Piserchio<sup>1</sup>, Eta A. Isiorho<sup>2</sup>, Kimberly Long<sup>3</sup>, Amanda L. Bohanon<sup>4</sup>, Eric A. Kumar<sup>5</sup>, Nathan Will<sup>1,6,¶</sup>, David Jeruzalmi<sup>1,6</sup>, Kevin N. Dalby<sup>3,4,5\*</sup> and Ranajeet Ghose<sup>1,6,7,8\*</sup>

<sup>1</sup>Department of Chemistry and Biochemistry, The City College of New York, New York, NY 10031.

<sup>2</sup>Macromolecular Crystallization Facility, CUNY ASRC, New York, NY 10031.

<sup>3</sup>Graduate Program in Cell and Molecular Biology, University of Texas, Austin, TX 78712.

<sup>4</sup>Graduate Program in Biochemistry, University of Texas, Austin, TX 78712.

<sup>5</sup>Division of Chemical Biology and Medicinal Chemistry, University of Texas, Austin, TX 78712.

<sup>6</sup>PhD Program in Biochemistry, The Graduate Center of CUNY, New York, NY 10016.

<sup>7</sup>PhD Program in Chemistry, The Graduate Center of CUNY, New York, NY 10016.

<sup>8</sup>PhD Program in Physics, The Graduate Center of CUNY, New York, NY 10016.

\*Correspondence: [dalby@austin.utexas.edu](mailto:dalby@austin.utexas.edu) and [rghose@ccny.cuny.edu](mailto:rghose@ccny.cuny.edu)

¶Current Address: Laboratory of Molecular Electron Microscopy, the Rockefeller University, New York, NY 10065.

## Abstract

Translation is a highly energy consumptive process<sup>1</sup> tightly regulated for optimal protein quality<sup>2</sup> and adaptation to energy and nutrient availability. A key facilitator of this process is the  $\alpha$ -kinase eEF-2K that specifically phosphorylates the GTP-dependent translocase eEF-2, thereby reducing its affinity for the ribosome and suppressing the elongation phase of protein synthesis<sup>3,4</sup>. eEF-2K activation requires calmodulin binding and auto-phosphorylation at the primary stimulatory site, T348. Biochemical studies have predicted that calmodulin activates eEF-2K through a unique allosteric process<sup>5</sup> mechanistically distinct from other calmodulin-dependent kinases<sup>6</sup>. Here we resolve the atomic details of this mechanism through a 2.3 Å crystal structure of the heterodimeric complex of calmodulin with the functional core of eEF-2K (eEF-2K<sub>TR</sub>). This structure, which represents the activated T348-phosphorylated state of eEF-2K<sub>TR</sub>, highlights how through an intimate association with the calmodulin C-lobe, the kinase creates a “spine” that extends from its N-terminal calmodulin-targeting motif through a conserved regulatory element to its active site. Modification of key spine residues has deleterious functional consequences.

## Introduction

Eukaryotic protein levels are predominantly controlled by mRNA translation<sup>7</sup>, an energetically expensive process<sup>1</sup> that is highly regulated<sup>8</sup> to ensure optimal transit times and maintain protein quality<sup>2</sup>, and fashion the cellular response to environmental stress and changes in energy/nutrient availability<sup>9</sup>. A primary driver of this regulation is the specific phosphorylation (on Thr-56) of the GTP-dependent translocase, eukaryotic elongation factor 2 (eEF-2). This covalent modification, uniquely catalyzed by the  $\alpha$ -kinase<sup>10</sup>, eukaryotic elongation factor 2 kinase (eEF-2K)<sup>11,12</sup>, diminishes the ability of eEF-2 to engage the ribosome suppressing the elongation phase of protein synthesis<sup>3,4</sup>. Dysregulation of eEF-2K activity has been linked to neurological conditions such as Alzheimer's-related dementia<sup>13</sup> and Parkinson's disease<sup>14</sup>. Aberrant eEF-2K function has been correlated to enhanced tumorigenesis<sup>15</sup>, invasion, and metastasis<sup>16</sup>. eEF-2K is, therefore, an emerging target for the development of therapeutics against several diseases, including many cancers<sup>17</sup>, and neuropathies<sup>18</sup>, underscoring the importance of understanding its regulation in mechanistic detail.

eEF-2K is the only  $\alpha$ -kinase reliant on calmodulin (CaM)<sup>11</sup> for activation through an allosteric process<sup>5</sup>. CaM binding enhances the apparent  $k_{cat}$  towards a peptide-substrate by ~2400-fold without significantly altering affinity. Subsequent auto-phosphorylation at the primary upregulating site (T348) provides an additional ~6-fold increase in  $k_{cat}$ , yielding the fully activated state. This mechanism is distinct from other CaM-dependent kinases that rely on CaM-induced displacement of an auto-inhibitory segment for enhanced substrate access<sup>6</sup>. eEF-2K activity is further modulated by  $Ca^{2+}$ <sup>19</sup>, pH<sup>20</sup>, and regulatory phosphorylation<sup>21</sup> via multiple pathways, including mTOR, AMPK, and ERK<sup>15</sup>. Obtaining insight into eEF-2K activation and regulation in atomic detail has been hindered by the absence of structures of the full-length enzyme or its CaM-

bound activated complex. We have identified a minimal functional eEF-2K construct, eEF-2K<sub>TR</sub> (Fig. 1a, Extended Data Fig. 1), activated by CaM similarly to the wild-type enzyme and efficiently phosphorylates eEF-2 in cells<sup>22</sup>. Using X-ray crystallography, we resolved the structure of its T348-phosphorylated state (p<sub>e</sub>EF-2K<sub>TR</sub>) in an activated heterodimeric complex with CaM (CaM•p<sub>e</sub>EF-2K<sub>TR</sub>) to 2.3 Å. Almost four decades after its discovery and characterization<sup>11</sup>, this structure provides the first critical insight into the atomic details of the unique mechanism of the CaM-mediated activation of eEF-2K.

## Results and discussion

### Structural features of p<sub>e</sub>EF-2K<sub>TR</sub>

The CaM•p<sub>e</sub>EF-2K<sub>TR</sub> complex forms an elongated structure (Fig. 1b) consistent with previous solution-state X-ray scattering (SAXS) measurements on the inactive complex (unphosphorylated T348)<sup>22</sup> (Extended Data Fig. 2). The kinase domain (KD) shows a characteristic  $\alpha$ -kinase architecture<sup>23,24</sup> with the “catalytic” residues in orientations suggestive of an active conformation (Extended Data Fig. 3a). While the P- and N/D-loops are closed (Extended Data Fig. 3b), as in the nucleotide-bound states of the related MHCK-A KD<sup>24,25</sup>, no density corresponding to nucleotide was apparent despite crystallization with the ATP-analog, AMP-PNP. Phosphorylated T348 (pT348; Extended Data Fig. 4) docks into a phosphate-binding pocket (PBP) hydrogen-bonding with the K205, R252, and T254 side-chains, and the L253 and T254 main-chains (Fig. 2a). D280 on the catalytic-loop hydrogen bonds with the side-chains of R252 and Y282. This interaction promotes methyl- $\pi$  interactions between I275 and Y282 (Fig. 2a), thereby coupling the catalytic site to the PBP.

The all-helical C-terminal domain (CTD) represents a feature unique to eEF-2K that forms a docking platform for eEF-2<sup>26,27</sup>. The  $\alpha 2'$ - $\alpha 7'$  region displays a pattern resembling SEL1-like

repeats<sup>28</sup>, the  $\alpha 8'$ - $\alpha 10'$  segment deviates from this arrangement, and  $\alpha 1'$  is somewhat disengaged from the rest of the CTD.  $\alpha 2'$  stabilizes the KD/CTD interface, interacting with  $\alpha E$  on the KD C-lobe ( $KD_C$ ) and  $\alpha 3'$  (Fig. 2b). The  $\alpha E$ - $\alpha 2'$  interface features hydrophobic interactions involving Y533 sandwiched by A306 and L307, and V526 inserted between M305 and L523. A curious feature within the  $\alpha E$ - $\alpha 2'$ - $\alpha 3'$  element is the linear spatial positioning of three conserved His residues (H527 and H534 on  $\alpha 2'$ ; H554 on  $\alpha 3'$ ; Fig. 2b); the also spatially proximal H557 stacks with H527. H554 forms a rare  $\delta$ - $\delta$  hydrogen bond with H527<sup>29</sup>. H534 and H554 form salt bridges with the conserved E332 on a helical R-loop segment ( $\alpha L''$ ). It is tempting to speculate that alternative protonation states of one or more of these His residues would modify interactions within the KD/CTD interface, and perhaps its coupling to the R-loop, through the  $\alpha E$ - $\alpha 2'$ - $\alpha 3'$  element, and thereby contribute to the observed pH response of the enzyme<sup>20</sup>. NMR studies<sup>27</sup> have localized the eEF-2 docking-site to the C-terminus of the CTD ( $\alpha 9'$ - $\alpha 10'$ ),  $\sim 60$  Å away from the active site, suggesting that distinct interactions drive eEF-2 recognition and its subsequent phosphorylation.

### **Recognition of *peEF-2K<sub>TR</sub>* by CaM**

CaM contacts *peEF-2K<sub>TR</sub>* in an extended conformation using both its N- ( $CaM_N$ ) and C-terminal ( $CaM_C$ ) lobes, with  $CaM_C$  being more intimately associated with the kinase (Fig. 3a). This assembly is consistent with changes in protection seen in previous hydrogen exchange mass spectrometry (HXMS) analyses (Extended Data Fig. 5)<sup>22,30</sup>. All four  $CaM_C$  helices engage the CaM-targeting motif (CTM) through their hydrophobic faces in a  $Ca^{2+}$ -bound “open” conformation, and all, except  $\alpha_H$ , interact with the N-lobe of the KD ( $KD_N$ ) using their predominantly hydrophilic faces. A deep hydrophobic pocket, lined by the side-chains of Ala88 (three-letter codes used for CaM residues), Phe92, Ile100, Leu105, Met124, Ile125, Val136,

Phe141, Met144, and Met145, accommodates W85 from the eEF-2K<sub>TR</sub> CTM. Additional hydrophobic interactions of I89 with Ala88 and Met145, and of A92 with Val91 and Leu112 generate a 1-5-8 binding mode (Fig. 3b) within a helical CTM ( $\alpha$ CTM) like in the NMR structure of the complex of CaM with a peptide encoding the CTM (CTM-pep, 74-100)<sup>31</sup>. However, no CaM<sub>C</sub>-bound Ca<sup>2+</sup> ions were seen in the peptide complex<sup>31</sup>. The hydrophilic face of CaM<sub>C</sub> makes numerous contacts with KD<sub>N</sub> over a large interaction surface (Fig. 3c). A “virtual alanine scan” at the interface identified several contacts involving residues for which *in silico* Ala mutations are substantially destabilizing ( $\Delta\Delta G > 1.5$  kcal/mol)<sup>32</sup>. These include Asp95 and Ser101 on CaM<sub>C</sub> and K192 and D208 on the eEF-2K<sub>TR</sub> KD, whose side-chains form a mesh of hydrogen bonds centered on K192 ( $\Delta\Delta G=2.5$  kcal/mol). Other notable interactions at the interface include a hydrogen bond between the Arg90 side-chain and the A164 main-chain and an L281-His107 methyl- $\pi$  interaction. These interactions collectively localize the CTM-tethered CaM<sub>C</sub> behind the kinase active site. An additional salt bridge between Asp122 and R351 couples CaM<sub>C</sub> to the R-loop.

CaM<sub>N</sub> engages *peEF-2K<sub>TR</sub>* in a Mg<sup>2+</sup>-bound “closed” state<sup>33</sup> contrasting its Ca<sup>2+</sup>-bound “open” conformation seen in the CTM-pep complex (Extended Data Fig. 6a,b)<sup>31</sup>. To the best of our knowledge, this conformation has not been previously observed in a CaM complex. In this configuration, the KD<sub>N</sub>  $\beta$ 6- $\beta$ 7-loop associates with shallow hydrophobic grooves on CaM<sub>N</sub>; F155 interacts with Leu39 and Phe12, and L156 with Leu4 and Met76 (Fig. 3d). CaM<sub>N</sub> is further stabilized through numerous crystal contacts with symmetry-related neighbors (Extended Data Fig. 6c). Given this unique conformation and the high Mg<sup>2+</sup> concentration for crystallization, we tested the influence of Mg<sup>2+</sup> on CaM<sub>N</sub>/*peEF-2K<sub>TR</sub>* interactions in solution. While the concentration of free Mg<sup>2+</sup> in mammalian cells remains relatively constant at  $\sim 1$  mM<sup>34</sup>, the Ca<sup>2+</sup> concentration,  $\sim 50$ -100 nM in resting cells, can be enhanced to  $\sim 100$   $\mu$ M<sup>35</sup> in calcium-microdomains under

specific stimuli. The  $\text{Ca}^{2+}:\text{Mg}^{2+}$  ratio (1:100) used for crystallization lies well within this cellular range. eEF-2K<sub>TR</sub> retains the ability to efficiently auto-phosphorylate on T348 under these conditions (Extended Data Fig. 6d). NMR analyses (Extended Data Fig. 7) using Ile- $\delta$ 1 and Met- $\epsilon$  resonances of CaM indicate no appreciable perturbations in the CaM<sub>C</sub> resonances with increasing  $\text{Mg}^{2+}$  within a complex formed in the presence of  $\text{Ca}^{2+}$ . This suggests that  $\text{Mg}^{2+}$ , even at very high concentrations, is unable to affect the interactions of *peEF-2K<sub>TR</sub>* with CaM<sub>C</sub> significantly. In contrast, CaM<sub>N</sub> resonances display evidence of exchange between  $\text{Ca}^{2+}$ - and  $\text{Mg}^{2+}$ -bound conformations with increasing  $\text{Mg}^{2+}$ . Indeed, at very high  $\text{Mg}^{2+}$  concentration where the  $\text{Ca}^{2+}:\text{Mg}^{2+}$  ratio is heavily skewed towards  $\text{Mg}^{2+}$ , as is the case in resting cells, CaM<sub>N</sub> disengages from *peEF-2K<sub>TR</sub>*.

As noted earlier, the CaM<sub>C</sub> metal-binding sites also appear to be occupied by  $\text{Ca}^{2+}$  in the CaM•*peEF-2K<sub>TR</sub>* complex, contrasting our previous studies on the CaM•CTM-pep<sup>31</sup> and CaM•eEF-2K<sub>TR</sub><sup>36</sup> complexes, both carried out in the absence of  $\text{Mg}^{2+}$ , using high- and low-resolution NMR approaches, respectively. Given the similar open configuration of CaM<sub>C</sub> in the complexes with *peEF-2K<sub>TR</sub>* and CTM-pep, it is apparent that minor rearrangements of its  $\text{Ca}^{2+}$ -binding EF-hands would suffice to accommodate  $\text{Ca}^{2+}$ . Indeed, a difference in the engagement of CaM<sub>C</sub> by the CTM (a shift of approximately half a helical turn) is seen upon comparing the two cases; the small accompanying changes in the corresponding EF-hands appear sufficient to accommodate  $\text{Ca}^{2+}$  (Extended Data Fig. 8).

It has been shown that the maximal activity of eEF-2K towards a peptide substrate is independent of  $\text{Ca}^{2+}$  with similar  $k_{\text{cat}}$  values obtained in its absence (11 sec<sup>-1</sup>) or presence (25 sec<sup>-1</sup>), contrasting a ~900-fold increase in the apparent  $\text{Ca}^{2+}$ -induced CaM-affinity (37  $\mu\text{M}$  versus 42 nM)<sup>37</sup>. The similar  $k_{\text{cat}}$  values suggest that divalent cations ( $\text{Mg}^{2+}$  or  $\text{Ca}^{2+}$ ) within CaM minimally

influence the nature of the active complex. Instead, the predominant role of these ions is to modulate the overall affinity of the CaM/eEF-2K<sub>TR</sub> interactions, i.e., to alter the “concentration” of the complex through additional interactions largely independent of those that define the active state.

### **Coupling of CaM<sub>C</sub> to the kinase active-site**

The loop (regulatory element, RE) that connects the eEF-2K<sub>TR</sub> CTM and KD contains a <sup>96</sup>PDPWA<sup>100</sup> sequence, fully conserved in vertebrates (<sup>97</sup>DPW<sup>99</sup> is universally conserved), that has been deemed essential for activity<sup>38</sup>. In the CaM•peEF-2K<sub>TR</sub> complex, D97, aligned through the flanking P96 and P98, hydrogen-bonds to the main-chains of W99 and A100 using its side-chain and main-chain, respectively. This conformation generates a bulge within the RE, placing W99 within a pocket created by the side-chains of P98, F102, F138, R148, V168, and Y231 (Fig. 4a). This configuration aligns a “spine” (invoking Kornev et al.<sup>39</sup>) comprising of CaM<sub>C</sub> and highly-conserved, predominantly hydrophobic (except R148) residues of the CTM, RE, and KD<sub>N</sub> to support the energetic coupling of CaM-binding to the active site through the bound ATP (Fig. 4b).

Given the close-packed nature of the spine in the CaM•peEF-2K<sub>TR</sub> complex, one may predict that its disruption would have profound functional consequences. For example, a W99A mutation is expected to be substantially more perturbative than replacement by a similarly sized Leu, as borne out by functional studies<sup>40</sup>. Further, P98 hydroxylation<sup>38</sup> or a His107Lys mutation<sup>20</sup>, both of which would significantly misalign the spine, have been shown to be deleterious to function. This effect contrasts a more modest impact of a less disruptive His107Ala mutation<sup>20</sup>. Additionally, sequence analyses suggest that mutations in the least, but still significantly conserved, spine residues, F138 and R148, co-vary with a nearby catalytic residue, R144. These are P139/P149/V145 in *Ursus americanus* and V137/V147/K143 in *Bos mutus*, perhaps resulting



in non-functional enzymes. Thus, in our proposed model, W85 provides intrinsic binding energy<sup>41</sup> for the interaction with CaM<sub>C</sub><sup>31</sup>, which is utilized, in part, to stabilize the configuration of the spine and concomitantly the active state of the kinase; W99 only contributes to the latter effect. This mechanism is consistent with the observation that a W85A mutation leads to an ~9-fold reduction in the catalytic activity and an ~8-fold decrease in the CaM-affinity; a W99A mutation leads to a ~30-fold decrease in the catalytic activity without affecting CaM-affinity (Fig. 4c).

### Conclusions and outlook

Our structure of the CaM•peEF-2K<sub>TR</sub> complex provides a framework to interpret the large body of biochemical and functional data generated by almost four decades of work on this unique enzyme in atomic detail. This structure, combined with current and previous biochemical/biophysical measurements, suggests a central role of CaM<sub>C</sub> in activating eEF-2K and defining the nature of the active state. In contrast, CaM<sub>N</sub> has a more supporting role, serving primarily as a sensor of dynamic changes in Ca<sup>2+</sup>, e.g., during neuronal Ca<sup>2+</sup> spikes/waves, in the face of a relatively constant Mg<sup>2+</sup> level, to enhance the cellular concentration of active complex. This regulation ensures maintenance of basal levels of the active species and optimal elongation rates through eEF-2 phosphorylation under normal cellular conditions while allowing its rapid modulation in response to specific signals.

However, the current structure leaves several unresolved questions about eEF-2K regulation. One such puzzle concerns the mechanism of the stimulatory auto-phosphorylation on S500<sup>42</sup>, which is also a target of protein kinase A (PKA)<sup>43</sup>. S500 is buried in a shallow pocket lined by the side-chains of H260, E264, H268, and F309 on the face opposite key catalytic elements, more than 20 Å away from the base D274 (Extended Data Fig. 9a). Auto-phosphorylation *in cis* could, in principle, be achieved by a partial unfolding of α1' with the added flexibility provided

by an intact R-loop in full-length eEF-2K. Indeed, auto-phosphorylation on S500 is extremely slow and requires prior phosphorylation on T348<sup>37</sup>; S500 phosphorylation is not detected in *peEF-2K<sub>TR</sub>*. Alternatively, auto-phosphorylation *in trans* (or phosphorylation by PKA) would require less substantial structural transitions and occur within a transiently assembled 2:2 species with an anti-parallel arrangement of its constituent CaM•*peEF-2K<sub>TR</sub>* subunits. Such an assembly would be compatible with our previous crosslinking MS (XLMS) results<sup>22</sup>, which are not consistent with the current heterodimeric structure (Extended Data Fig. 9b), without invoking dramatic conformational changes. Native MS studies on the CaM•eEF-2K<sub>TR</sub> complex reveal charge states corresponding to a 2:2 complex, albeit at extremely low levels<sup>22</sup>. Similar questions regarding the conformational changes that enable (or follow) other regulatory phosphorylation events, e.g., on S366 (a target for p90<sup>RSK44</sup>), also remain unresolved since several of these modulatory R-loop sites are missing in eEF-2K<sub>TR</sub>.

**Acknowledgments:** The authors thank Mr. Fatlum Hajredini and Dr. Kwangwoon Lee (Harvard Medical School) for their comments about the work. Dr. Kevin Battaile (New York Structural Biology Center) is thanked for his support during data collection and analysis.

**Funding:** This work is supported by NIH awards R01 GM123252 (to KND and RG) and the Welch Foundation F-1390 (KND). The National Crystallization Center at Hauptman-Woodward Medical Research Institute is supported through NIH award R24 GM141256. Use of the NYX beamline (19-ID) at the National Synchrotron Light Source II (NSLS II) is supported by the member institutions of the New York Structural Biology Center. NSLS II is a United States Department of Energy (DOE) Office of Science User Facility operated for the DOE Office of Science by Brookhaven National Laboratory under Contract DE-SC0012704.

**Author Contributions:** AP prepared samples for all biophysical measurements and optimized crystallization conditions together with EAI; AP and EAI collected crystallographic data; AP calculated and refined the structural model with support from EAI and DJ; AP performed and analyzed all the solution NMR measurements; KL, AB, and EAK performed the functional studies; NW designed the eEF-2K<sub>TR</sub> construct; KND and RG developed the project; AP generated the first draft of the manuscript and figures that KND and RG subsequently refined with input from all the authors.

**Data availability:** Atomic coordinates for the CaM•peEF-2K<sub>TR</sub> complex have been deposited in the Protein Data Bank (PDB) with accession code 7SHQ.

**Competing interests:** The authors declare no competing interests.

## References

- 1 Buttgereit, F. & Brand, M. D. A hierarchy of ATP-consuming processes in mammalian cells. *Biochem. J.* **312**, 163-167 (1995).
- 2 Stein, K. C. & Frydman, J. The stop-and-go traffic regulating protein biogenesis: How translation kinetics controls proteostasis. *J. Biol. Chem.* **294**, 2076-2084 (2019).
- 3 Ryazanov, A. G., Shestakova, E. A. & Natapov, P. G. Phosphorylation of elongation factor 2 by EF-2 kinase affects rate of translation. *Nature* **334**, 170-173 (1988).
- 4 Ryazanov, A. G. & Davydova, E. K. Mechanism of elongation factor 2 (EF-2) inactivation upon phosphorylation. Phosphorylated EF-2 is unable to catalyze translocation. *FEBS Lett.* **251**, 187-190 (1989).
- 5 Tavares, C. D. *et al.* The molecular mechanism of eukaryotic elongation factor 2 kinase activation. *J. Biol. Chem.* **289**, 23901-23916 (2014).
- 6 Swulius, M. T. & Waxham, M. N. Ca<sup>2+</sup>/calmodulin-dependent protein kinases. *Cell. Mol. Life Sci.* **65**, 2637-2657 (2008).
- 7 Liu, Y., Beyer, A. & Aebersold, R. On the dependency of cellular protein levels on mRNA abundance. *Cell* **165**, 535-550 (2016).
- 8 Schuller, A. P. & Green, R. Roadblocks and resolutions in eukaryotic translation. *Nat. Rev. Mol. Cell Biol.* **19**, 526-541 (2018).
- 9 Han, N. C., Kelly, P. & Ibba, M. Translational quality control and reprogramming during stress adaptation. *Exp. Cell Res.* **394**, 112161 (2020).
- 10 Middelbeek, J., Clark, K., Venselaar, H., Huynen, M. A. & van Leeuwen, F. N. The alpha-kinase family: an exceptional branch on the protein kinase tree. *Cell. Mol. Life Sci.* **67**, 875-890 (2010).

- 11 Nairn, A. C., Bhagat, B. & Palfrey, H. C. Identification of calmodulin-dependent protein kinase III and its major Mr 100,000 substrate in mammalian tissues. *Proc. Natl. Acad. Sci. USA* **82**, 7939-7943 (1985).
- 12 Nairn, A. C. & Palfrey, H. C. Identification of the major M<sub>r</sub> 100,000 substrate for calmodulin-dependent protein kinase III in mammalian cells as elongation factor-2. *J. Biol. Chem.* **262**, 17299-17303 (1987).
- 13 Yang, W., Zhou, X., Ryazanov, A. G. & Ma, T. Suppression of the kinase for elongation factor 2 alleviates mGluR-LTD impairments in a mouse model of Alzheimer's disease. *Neurobiol. Aging* **98**, 225-230 (2021).
- 14 Jan, A. *et al.* Activity of translation regulator eukaryotic elongation factor-2 kinase is increased in Parkinson disease brain and its inhibition reduces alpha synuclein toxicity. *Acta Neuropathol. Commun.* **6**, 54 (2018).
- 15 Leprivier, G. *et al.* The eEF2 kinase confers resistance to nutrient deprivation by blocking translation elongation. *Cell* **153**, 1064-1079 (2013).
- 16 Xie, J. *et al.* Eukaryotic elongation factor 2 kinase upregulates the expression of proteins implicated in cell migration and cancer cell metastasis. *Int. J. Cancer* **142**, 1865-1877 (2018).
- 17 Temme, L. & Asquith, C. R. M. eEF2K: an atypical kinase target for cancer. *Nat. Rev. Drug Discov.* **20**, 577 (2021).
- 18 Beretta, S., Gritti, L., Verpelli, C. & Sala, C. Eukaryotic elongation factor 2 kinase a pharmacological target to regulate protein translation dysfunction in neurological diseases. *Neuroscience* **445**, 42-49 (2020).

- 19 Proud, C. G. Regulation and roles of elongation factor 2 kinase. *Biochem. Soc. Trans.* **43**, 328-332 (2015).
- 20 Xie, J. *et al.* Molecular mechanism for the control of eukaryotic elongation factor 2 kinase by pH: role in cancer cell survival. *Mol. Cell Biol.* **35**, 1805-1824 (2015).
- 21 Redpath, N. T., Price, N. T., Severinov, K. V. & Proud, C. G. Regulation of elongation factor-2 by multisite phosphorylation. *Eur. J. Biochem.* **213**, 689-699 (1993).
- 22 Will, N. *et al.* Structural dynamics of the activation of elongation factor 2 kinase by Ca<sup>2+</sup>-calmodulin. *J. Mol. Biol.* **430**, 2802-2821 (2018).
- 23 Yamaguchi, H., Matsushita, M., Nairn, A. C. & Kuriyan, J. Crystal structure of the atypical protein kinase domain of a TRP channel with phosphotransferase activity. *Mol. Cell* **7**, 1047-1057 (2001).
- 24 Ye, Q., Crawley, S. W., Yang, Y., Cote, G. P. & Jia, Z. Crystal structure of the alpha-kinase domain of *Dictyostelium* myosin heavy chain kinase A. *Sci. Signal.* **3**, ra17 (2010).
- 25 Ye, Q. *et al.* Structure of the *Dictyostelium* myosin-II heavy chain kinase A (MHCK-A) alpha-kinase domain apoenzyme reveals a novel autoinhibited conformation. *Sci. Rep.* **6** (2016).
- 26 Pigott, C. R. *et al.* Insights into the regulation of eukaryotic elongation factor 2 kinase and the interplay between its domains. *Biochem. J.* **442**, 105-118 (2012).
- 27 Piserchio, A. *et al.* Solution structure of the carboxy-terminal tandem repeat domain of eukaryotic elongation factor 2 kinase and its role in substrate recognition. *J. Mol. Biol.* **431**, 2700-2717 (2019).
- 28 Mittl, P. R. & Schneider-Brachert, W. Sell-like repeat proteins in signal transduction. *Cell Signal* **19**, 20-31 (2007).

- 29 Iyer, A. H., Krishna Deepak, R. N. V. & Sankararamakrishnan, R. Imidazole nitrogens of two histidine residues participating in n-h...n hydrogen bonds in protein structures: structural bioinformatics approach combined with quantum chemical calculations. *J. Phys. Chem. B* **122**, 1205-1212 (2018).
- 30 Piserchio, A. *et al.* Structural dynamics of the complex of calmodulin with a minimal functional construct of eukaryotic elongation factor 2 kinase and the role of Thr348 autophosphorylation. *Protein Sci.* **30**, 1221-1234 (2021).
- 31 Lee, K. *et al.* Structural basis for the recognition of eukaryotic elongation factor 2 kinase by calmodulin. *Structure* **24**, 1441-1451 (2016).
- 32 Kortemme, T., Kim, D. E. & Baker, D. Computational alanine scanning of protein-protein interfaces. *Sci. STKE* **2004**, p12 (2004).
- 33 Senguen, F. T. & Grabarek, Z. X-ray structures of magnesium and manganese complexes with the N-terminal domain of calmodulin: insights into the mechanism and specificity of metal ion binding to an EF-hand. *Biochemistry* **51**, 6182-6194 (2012).
- 34 Romani, A. Regulation of magnesium homeostasis and transport in mammalian cells. *Arch. Biochem. Biophys.* **458**, 90-102 (2007).
- 35 Fernandez-Sanz, C., De la Fuente, S. & Sheu, S. S. Mitochondrial Ca<sup>2+</sup> concentrations in live cells: quantification methods and discrepancies. *FEBS Lett.* **593**, 1528-1541 (2019).
- 36 Lee, K., Kumar, E. A., Dalby, K. N. & Ghose, R. The role of calcium in the interaction between calmodulin and a minimal functional construct of eukaryotic elongation factor 2 kinase. *Protein Sci.* **28**, 2089-2098 (2019).
- 37 Tavares, C. D. J. *et al.* Signal integration at elongation factor 2 kinase: the roles of calcium, calmodulin, and Ser-500 phosphorylation. *J. Biol. Chem.* **292**, 2032-2045 (2017).

- 38 Moore, C. E. *et al.* Elongation factor 2 kinase is regulated by proline hydroxylation and protects cells during hypoxia. *Mol. Cell. Biol.* **35**, 1788-1804 (2015).
- 39 Kornev, A. P., Taylor, S. S. & Ten Eyck, L. F. A helix scaffold for the assembly of active protein kinases. *Proc. Natl. Acad. Sci. USA* **105**, 14377-14382 (2008).
- 40 Moore, C. E., Regufe da Mota, S., Mikolajek, H. & Proud, C. G. A conserved loop in the catalytic domain of eukaryotic elongation factor 2 kinase plays a key role in its substrate specificity. *Mol. Cell Biol.* **34**, 2294-2307 (2014).
- 41 Jencks, W. P. On the attribution and additivity of binding energies. *Proc. Natl. Acad. Sci. USA* **78**, 4046-4050 (1981).
- 42 Tavares, C. D. *et al.* Calcium/calmodulin stimulates the autophosphorylation of elongation factor 2 kinase on Thr-348 and Ser-500 to regulate its activity and calcium dependence. *Biochemistry* **51**, 2232-2245 (2012).
- 43 Redpath, N. T. & Proud, C. G. Cyclic AMP-dependent protein kinase phosphorylates rabbit reticulocyte elongation factor-2 kinase and induces calcium-independent activity. *Biochem. J.* **293**, 31-34 (1993).
- 44 Wang, X. *et al.* Regulation of elongation factor 2 kinase by p90<sup>RSK1</sup> and p70 S6 kinase. *EMBO J.* **20**, 4370-4379 (2001).



## Methods

### Crystallization of the CaM•pTR complex

The protocols used for the expression and purification of eEF-2K<sub>TR</sub> and CaM, the selective phosphorylation of the former at T348 (to generate *peEF-2K<sub>TR</sub>*), and the subsequent purification of the 1:1 heterodimeric CaM•*peEF-2K<sub>TR</sub>* complex were performed as described previously<sup>22,30</sup>. The final samples used in the crystallization trials consisted of ~11.0 mg/mL of the CaM•*peEF-2K<sub>TR</sub>* complex in a buffer containing 20 mM Tris (pH 7.5), 100 mM NaCl, 3.0 mM CaCl<sub>2</sub>, 1.0 mM tris(2-carboxyethyl)phosphine (TCEP, GoldBio), 1.5 mM MgCl<sub>2</sub> and 1.0 mM AMP-PNP (Millipore Sigma). Initial screens to identify crystallization conditions were performed under oil at the National Crystallization Center at the Hauptman-Woodward Medical Research Institute. Potential conditions were further optimized in-house, and optimal conditions were identified as the following: 100 mM Bis-Tris (pH 6.9), 200-300 mM MgCl<sub>2</sub>, and 20-26% PEG3350 combined in a 1:1 or 2:1 ratio plated on Greiner 72-well micro-batch plates (Hampton Research) under paraffin oil (EMD Chemicals) at ambient temperature. Multiple crystal clusters emerged in less than 12 hours, reaching their maximum size within a few days. Most of these, however, were extremely fragile and diffracted poorly. A single condition, 1:1 ratio, 24% PEG3350, and 300 mM MgCl<sub>2</sub>, yielded crystals that produced diffraction data of good quality.

### Structure determination

Data were collected at the NSLS-II light source at Brookhaven National Labs utilizing the 19-ID (NYX) beamline. Two datasets collected on distinct regions of the same crystal were processed and combined using the autoPROC toolbox<sup>45</sup> resulting in a dataset with a resolution of 2.3 Å. The crystal (P3<sub>1</sub>21) with an elongated unit cell ( $a = b = 58.49$  Å,  $c = 365.78$  Å) contained a single CaM•*peEF-2K<sub>TR</sub>* heterodimer in the asymmetric unit. Initial phases were obtained using

phenix.mr\_rosetta<sup>46</sup> and an alignment file obtained from the HHpred server<sup>47</sup> containing 53 entries, including sequences corresponding to the crystal structures of the  $\alpha$ -kinase domains of MHCK-II<sup>25</sup>, ChaK<sup>23</sup>, together with those of several SEL-1 and TPR repeat-containing proteins. The initial model was built using multiple cycles consisting of Phaser<sup>48</sup>, Coot<sup>49</sup>, and phenix.refine<sup>50</sup>. At the end of the initial build, further optimization was carried out using the PDB\_REDO server<sup>51</sup>, yielding a model that contained 469 eEF-2K<sub>TR</sub> residues (88%) and the C-lobe of CaM. Most of the CaM N-lobe (except the loop between helices  $\alpha_C$  and  $\alpha_D$ ) was built through iterative manual fitting with Coot followed by refinement using Phenix. A comparison of the CaM N-lobe fold with existing CaM structures using the DALI server<sup>52</sup> showed its close resemblance to a Mg<sup>2+</sup>-bound closed form. Indeed, molecular replacement using Phaser and PDB:3UCW<sup>33</sup> together with the rest of the CaM•eEF-2K<sub>TR</sub> complex structure yielded a nearly complete model. The remaining missing segments of the structure of the complex were then progressively added and improved using Coot, phenix.refine, and ISoLDE<sup>53</sup>. Cations were identified using the CheckMyBlob server<sup>54</sup> and inserted with solvent molecules using Coot and refined using Phenix. The final structural model consisted of 493 and 145 residues of eEF-2K<sub>TR</sub> (92.8%) and CaM (97.9%), respectively, together with 1 Zn<sup>2+</sup>, 2 Ca<sup>2+</sup>, 5 Mg<sup>2+</sup> ions and 145 water molecules. No discernible density for AMPPNP was observed. Details about data collection and refinement are shown in Extended Data Table 1.

The sequence conservation in eEF-2K<sub>TR</sub> was obtained using the ConSurf server<sup>55</sup> with default parameters that generated a comparison with 150 non-redundant sequences (95% identity cut-off). The generated alignment file was read into UCSF ChimeraX<sup>56</sup> and represented on the eEF-2K<sub>TR</sub> structure with the corresponding residues colored by their AL2CO scores<sup>57</sup>.

## Solution NMR spectroscopy

$^{13}\text{C}$ ,  $^1\text{H}$ -Ile- $\delta 1$ , Met- $\epsilon$ ,  $^2\text{H}$ ,  $^{15}\text{N}$ -labeled CaM (IM-labeled CaM)<sup>36</sup> and unlabeled *peEF-2K<sub>TR</sub>*<sup>30</sup> were prepared as previously described, and the corresponding 1:1 heterodimeric complex was purified as described above. All NMR samples (unless specifically noted) were prepared in a buffer (NMR buffer) containing 20 mM HEPES (pH 7.5), 100 mM NaCl, 1.0 mM TCEP, and 5%  $^2\text{H}_2\text{O}$ . The following samples were prepared: (1) IM-labeled CaM alone ( $\sim 100\ \mu\text{M}$ ) in NMR buffer containing 3.0 mM  $\text{CaCl}_2$  or (2) as part of the corresponding CaM•*peEF-2K<sub>TR</sub>* complex ( $\sim 147\ \mu\text{M}$ ); (3) IM-labeled CaM ( $\sim 100\ \mu\text{M}$ ) in NMR buffer containing 5.0 mM EGTA and 310 mM  $\text{MgCl}_2$ ; (4) IM-labeled CaM alone ( $\sim 100\ \mu\text{M}$ ) in NMR buffer containing 3.0 mM  $\text{CaCl}_2$  and 300 mM  $\text{MgCl}_2$  or (5) as part of the corresponding CaM•*peEF-2K<sub>TR</sub>* complex ( $\sim 147\ \mu\text{M}$ ); (6)  $\sim 50\ \mu\text{M}$  samples of IM-labeled CaM in NMR buffer containing  $\sim 150\ \mu\text{M}$  DSS and 0, 0.2, 0.4, 5.0, 20, 103 or 310 mM  $\text{MgCl}_2$  (all samples contained EGTA in a  $\sim 1/60$  ratio with respect to  $\text{Mg}^{2+}$ ); (7) samples containing  $\sim 18\ \mu\text{M}$  of the CaM•*peEF-2K<sub>TR</sub>* complex in buffer comprising 20 mM HEPES (pH 7.5), 10 mM NaCl, 0.5 mM TCEP,  $\sim 150\ \mu\text{M}$  DSS, and 0.3 mM  $\text{CaCl}_2$  with 0, 1.0, 3.0, 6.0, 12.0, 36, 68, 115, 240 and 450 mM  $\text{MgCl}_2$ .  $^1\text{H}$ ,  $^{13}\text{C}$  SOFAST-HMQC<sup>58</sup> experiments were carried out on all samples using sweep-widths of 13.95 ppm (512 complex points) and 12.0 ppm (128 complex points) in the direct and indirect dimensions, respectively. All experiments were carried out at 25 °C on an 800 MHz Bruker Avance-III HD spectrometer equipped with a triple-resonance cryogenic probe capable of applying pulsed-field gradients along the z-axis. Data were processed using nmrPipe<sup>59</sup> and analyzed using nmrViewJ<sup>60</sup>. Chemical shift perturbations ( $\Delta\delta$  in ppm) were calculated using<sup>36</sup>

$$\Delta\delta = \sqrt{(\delta_{ref,H} - \delta_H)^2 + \left[\frac{1}{3.94}(\delta_{ref,C} - \delta_C)\right]^2}$$

Where  $\delta_{ref,H}$  and  $\delta_{ref,C}$  are the reference  $^1\text{H}$  and  $^{13}\text{C}$  methyl chemical shifts, respectively, and  $\delta_H$  and  $\delta_C$  are the corresponding shifts in the presence of relevant additives.

### Small-angle X-ray scattering

Small-angle X-ray scattering (SAXS) data were acquired on two samples containing 1.9 mg/mL (lc) and 6.4 mg/mL (hc) of the CaM•eEF-2K<sub>TR</sub> complex (unphosphorylated eEF-2K<sub>TR</sub>), as previously described<sup>22</sup>. These data were reanalyzed using ATSAS 3.0.1 software<sup>61</sup>, and identical results as those shown in Table 3 of Will et al.<sup>22</sup>, were obtained. However, a slightly different approach was utilized to obtain *ab initio* 3-dimensional models from the SAXS data. 25 structures were calculated for each of the hc and lc datasets using DAMMIF<sup>62</sup> using default parameters in the slow mode and clustered using DAMCLUST<sup>63</sup>. For the hc dataset, a total of 6 clusters were obtained in which 3 (hc\_1, hc\_2, hc\_4) contained a single member, 1 each contained 2 (hc\_5) or 3 (hc\_3) members, and the largest cluster (hc\_6; NSD to all other clusters = 1.47±0.31) comprised of 17 members. The averaged envelope from 6\_hc was refined against the experimental hc dataset ( $\chi^2=0.9766$ ) using DAMMIN<sup>64</sup> (run in the slow mode using default parameters) by restricting the search volume using DAMSTART. For the lc dataset, 2 clusters contained a single member (lc\_1, lc\_2), 1 each contained 3 (lc\_5), 5 (lc\_6), 7 (lc\_3) or 8 members (lc\_4). Thus, the averaged structures from the two largest clusters (lc\_3 and lc\_4, NSD=1.16) were separately refined against the experimental lc dataset ( $\chi^2=0.7761$  and  $\chi^2=0.7767$  for lc\_3 and lc\_4, respectively).

The SAXS profile was calculated from the structure of the CaM•peEF-2K<sub>TR</sub> complex using CRY SOL3<sup>65</sup> and fitted separately to the lc and hc datasets yielding  $\chi^2$  values of 1.504 and 3.217, respectively, suggesting that the former provides a somewhat better agreement with that expected from the structure. The molecular envelopes calculated from each dataset (lc\_3, lc\_4, hc\_6) were superimposed on the crystal structure using SUPCOMB<sup>66</sup>. The structure of the CaM•peEF-2K<sub>TR</sub>

complex fitted into the refined molecular envelope of the lc<sub>3</sub> cluster and a comparison of the theoretical and calculated data for the lc dataset are shown in Extended Data Fig. 2.

### **Measurement of eEF-2K<sub>TR</sub> activity in the presence of Mg<sup>2+</sup>**

Auto-phosphorylation of eEF-2K<sub>TR</sub> (500 nM) was carried out in buffer comprising 25 mM HEPES (pH 7.0), 2 mM DTT, 40 µg/mL BSA, 50 mM KCl, and 5 µM CaM. The reaction was conducted under two distinct conditions – one with 15 mM MgCl<sub>2</sub> and 0.15 mM CaCl<sub>2</sub> and a second with 150 mM MgCl<sub>2</sub> and 1.5 mM CaCl<sub>2</sub>. The reaction mixture was incubated at 30 °C for 10 min, and the reaction was initiated by the addition of 500 µM [ $\gamma$ -<sup>32</sup>P]ATP (100–1000 c.p.m./pmol) in a final volume of 250 µL. Aliquots (10 pmol/20 µL) of eEF-2K<sub>TR</sub> were removed every 0, 10, 23, 32, 40, 60, 120 and 300 s over a 5 min time period and directly added to hot SDS–PAGE sample loading buffer containing 125 mM Tris-HCl (pH 6.75), 20% glycerol (v/v), 10% 2-mercaptoethanol (v/v), 4% SDS, and 0.02% bromophenol blue) to quench the reaction. The mixture was further heated for 5 min at 95 °C to ensure complete denaturation. The samples were resolved by SDS–PAGE and stained with Coomassie Brilliant Blue. Gels were exposed for 8 h in a phosphorimager cassette, scanned in a Typhoon 9500 imager, and analyzed using ImageJ. Autophosphorylation was quantified by drying the gels and excising the eEF-2K<sub>TR</sub>-containing segments. The radioactivity was measured with a Packard 1500 liquid scintillation analyzer.

### **Measurement of the activity of full-length eEF-2K and mutants.**

Assays were performed in buffer containing 25 mM HEPES, 50 mM KCl, 10 mM MgCl<sub>2</sub>, 150 µM CaCl<sub>2</sub>, 20 µg/mL BSA, 100 µM EGTA, 2 mM DTT, 0–4 µM CaM, and 10 µM sox-peptide<sup>67</sup>. The assays used 5 nM, 10.5 nM, or 8.6 nM of unphosphorylated wild-type eEF-2K, the W85A mutant, or the W99A mutant, respectively. The reaction was initiated with the addition of 1 mM ATP. Product turnover was monitored by fluorescence (excitation at 360 nm, emission at

482 nm) using a Synergy H4 plate reader (BioTek). The data were analyzed using a quadratic binding isotherm to obtain  $k_{\text{obs,max}}$ , and  $K_{\text{CaM}}$  values. Experiments were performed in duplicate (for wild-type) or in triplicate (for the W85A and W99A mutants).

- 45 Vonrhein, C. *et al.* Data processing and analysis with the autoPROC toolbox. *Acta Crystallogr. D Biol. Crystallogr.* **67**, 293-302 (2011).
- 46 Terwilliger, T. C. *et al.* phenix.mr\_rosetta: molecular replacement and model rebuilding with Phenix and Rosetta. *J. Struct. Funct. Genomics* **13**, 81-90 (2012).
- 47 Hildebrand, A., Remmert, M., Biegert, A. & Soding, J. Fast and accurate automatic structure prediction with HHpred. *Proteins* **77**, 128-132 (2009).
- 48 Zwart, P. H. *et al.* Automated structure solution with the PHENIX suite. *Meth. Mol. Biol.* **426**, 419-435 (2008).
- 49 Emsley, P. & Cowtan, K. Coot: model-building tools for molecular graphics. *Acta Crystallogr. D Biol. Crystallogr.* **60**, 2126-2132 (2004).
- 50 Afonine, P. V. *et al.* Towards automated crystallographic structure refinement with phenix.refine. *Acta Crystallogr. D Biol. Crystallogr.* **68**, 352-367 (2012).
- 51 Joosten, R. P., Long, F., Murshudov, G. N. & Perrakis, A. The PDB\_REDO server for macromolecular structure model optimization. *IUCr J* **1**, 213-220 (2014).
- 52 Holm, L. & Laakso, L. M. Dali server update. *Nucleic Acids Res.* **44**, W351-355 (2016).
- 53 Reynes, C. *et al.* ISoLDE: a data-driven statistical method for the inference of allelic imbalance in datasets with reciprocal crosses. *Bioinformatics* **36**, 504-513 (2020).
- 54 Brzezinski, D., Porebski, P. J., Kowiel, M., Macnar, J. M. & Minor, W. Recognizing and validating ligands with CheckMyBlob. *Nucleic Acids Res.* **49**, W86-W92 (2021).
- 55 Ashkenazy, H. *et al.* ConSurf 2016: an improved methodology to estimate and visualize evolutionary conservation in macromolecules. *Nucleic Acids Res.* **44**, W344-350 (2016).
- 56 Pettersen, E. F. *et al.* UCSF ChimeraX: Structure visualization for researchers, educators, and developers. *Protein Sci.* **30**, 70-82 (2021).

- 57 Pei, J. & Grishin, N. V. AL2CO: calculation of positional conservation in a protein sequence alignment. *Bioinformatics* **17**, 700-712 (2001).
- 58 Amero, C. *et al.* Fast two-dimensional NMR spectroscopy of high molecular weight protein assemblies. *J. Am. Chem. Soc.* **131**, 3448-3449 (2009).
- 59 Delaglio, F. *et al.* NMRPipe: a multidimensional spectral processing system based on UNIX pipes. *J. Biomol. NMR* **6**, 277-293 (1995).
- 60 Johnson, B. A. From raw data to protein backbone chemical shifts using NMRFX processing and NMRViewJ analysis. *Meth. Mol. Biol.* **1688**, 257-310 (2018).
- 61 Manalastas-Cantos, K. *et al.* ATSAS 3.0: expanded functionality and new tools for small-angle scattering data analysis. *J. Appl. Crystallogr.* **54**, 343-355 (2021).
- 62 Franke, D. & Svergun, D. I. DAMMIF, a program for rapid *ab-initio* shape determination in small-angle scattering. *J. Appl. Crystallogr.* **42**, 342-346 (2009).
- 63 Petoukhov, M. V. *et al.* New developments in the ATSAS program package for small-angle scattering data analysis. *J. Appl. Crystallogr.* **45**, 342-350 (2012).
- 64 Svergun, D. I. Restoring low resolution structure of biological macromolecules from solution scattering using simulated annealing. *Biophys. J.* **76**, 2879-2886 (1999).
- 65 Franke, D. *et al.* ATSAS 2.8: a comprehensive data analysis suite for small-angle scattering from macromolecular solutions. *J. Appl. Crystallogr.* **50**, 1212-1225 (2017).
- 66 Kozin, M. B. & Svergun, D. I. Automated matching of high- and low-resolution structural models. *J. Appl. Crystallogr.* **34**, 33-41 (2001).
- 67 Devkota, A. K. *et al.* High-throughput screens for eEF-2 kinase. *J. Biomol. Screen.* **19**, 445-452 (2014).



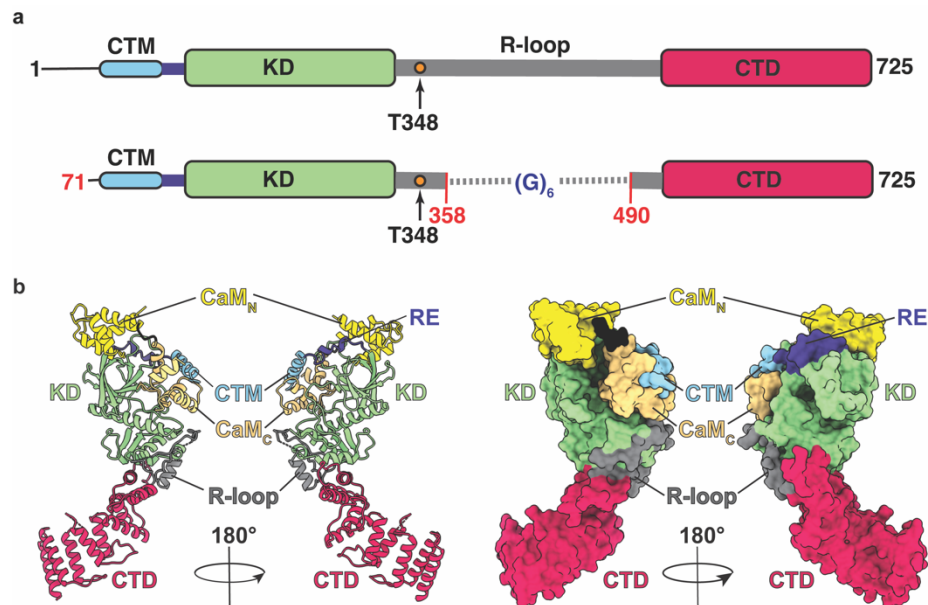

**Fig. 1 Structure of the CaM•peEF-2K<sub>TR</sub> complex.** **a**, Schematic representation of the eEF-2K (top) structural modules indicating the CTM (cyan), RE (navy-blue), KD (lime-green), R-loop (grey) and CTD (crimson). eEF-2K<sub>TR</sub> (bottom) is missing 70 N-terminal residues, and a 6-glycine linker replaces the 359-489 segment of the R-loop. **b**, Structure of the CaM•peEF-2K<sub>TR</sub> complex shown in ribbon (left) or surface (right) representation; CaM<sub>N</sub> and CaM<sub>C</sub> are colored bright and dull yellow, respectively. The same color scheme is used in all figures unless otherwise stated.

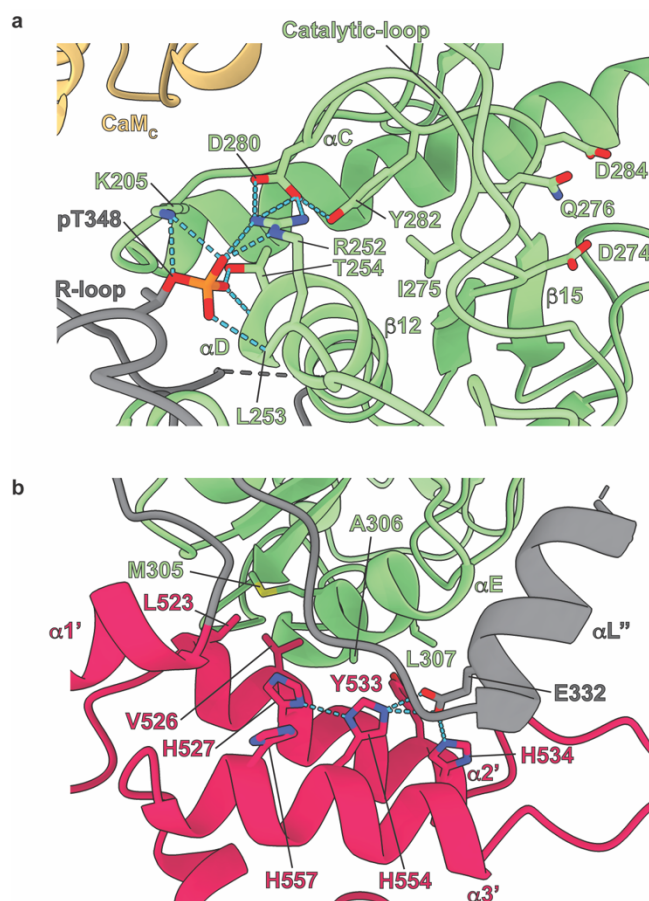

**Fig. 2** Intramolecular interactions within *peEF-2K<sub>TR</sub>* in the *CaM*•*peEF-2K<sub>TR</sub>* complex. **a**, Interactions that stabilize *pT348* at the phosphate-binding pocket (PBP) and couple the PBP to the active site are indicated. Key catalytic-loop residues, including the base D274, Q276, and D284, are shown for reference. **b**, Key interactions involving the  $\alpha E$ - $\alpha 2'$ - $\alpha 3'$  element that stabilize the KD/CTD interface are shown.

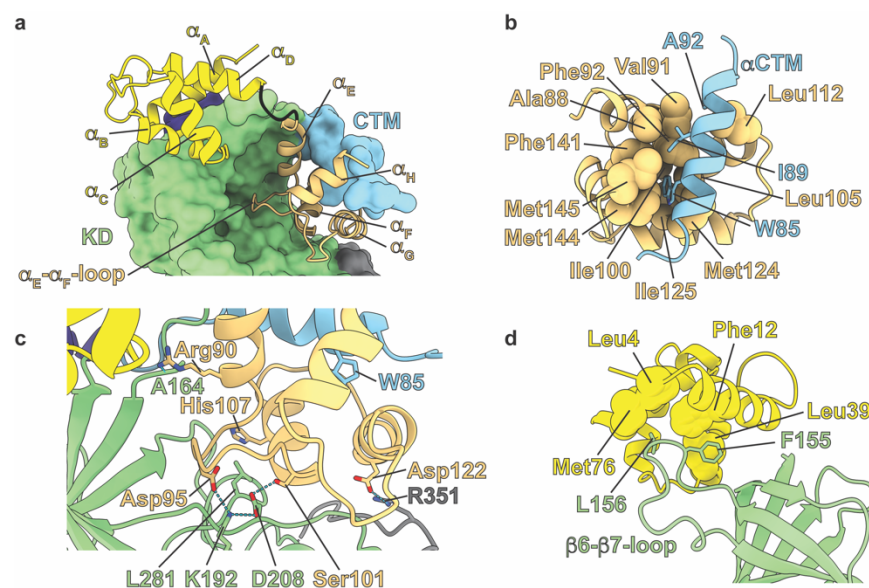

**Fig. 3 Intermolecular interactions between CaM and *peEF-2K<sub>TR</sub>*.** **a**, CaM and *eEF-2K<sub>TR</sub>* are shown in ribbon and surface representations, respectively. CaM<sub>N</sub> ( $\alpha_A$ - $\alpha_D$ ) and CaM<sub>C</sub> ( $\alpha_E$ - $\alpha_G$ ) helices are indicated. Interactions with the hydrophobic (**b**) and hydrophilic (**c**) faces of CaM<sub>C</sub> with the CTM and KD<sub>N</sub>, respectively. **d**, Interactions of CaM<sub>N</sub> with the  $\beta$ 6- $\beta$ 7-loop of KD<sub>N</sub>. Elements not directly involved in the interaction are hidden to aid visualization.

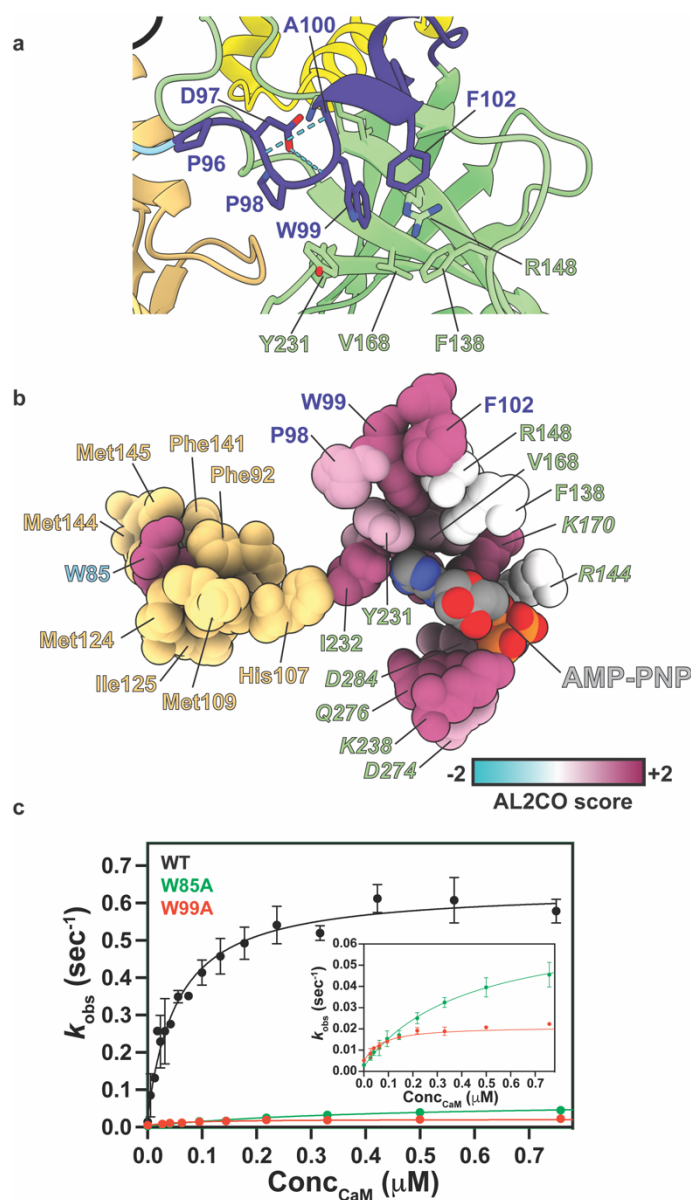

**Fig. 4 Activation of eEF-2K<sub>TR</sub> by CaM.** **a**, Interactions of the RE with KD<sub>N</sub>. **b**, Residues of the spine connecting CaM<sub>C</sub> (yellow) to the eEF-2K<sub>TR</sub> active site. eEF-2K<sub>TR</sub> residues are colored according to conservation scores (cyan: variable, maroon: fully-conserved). AMP-PNP has been modeled in. **c**, Activity of wild-type eEF-2K (WT, black), and corresponding W85A (green) and W99A (red) mutants. The maximal catalytic rates ( $sec^{-1}$ ) are WT: $0.61 \pm 0.02$ , W85A: $0.07 \pm 0.002$ , W99A: $0.02 \pm 0.001$ ; the corresponding affinities (nM) are  $52 \pm 8$ ,  $406 \pm 47$ ,  $62 \pm 19$ . The inset shows an expansion for the two mutants. Error bars indicate standard deviations over  $n=2$  (WT) and  $n=3$  (mutants) measurements.

## **Extended Data and Tables**

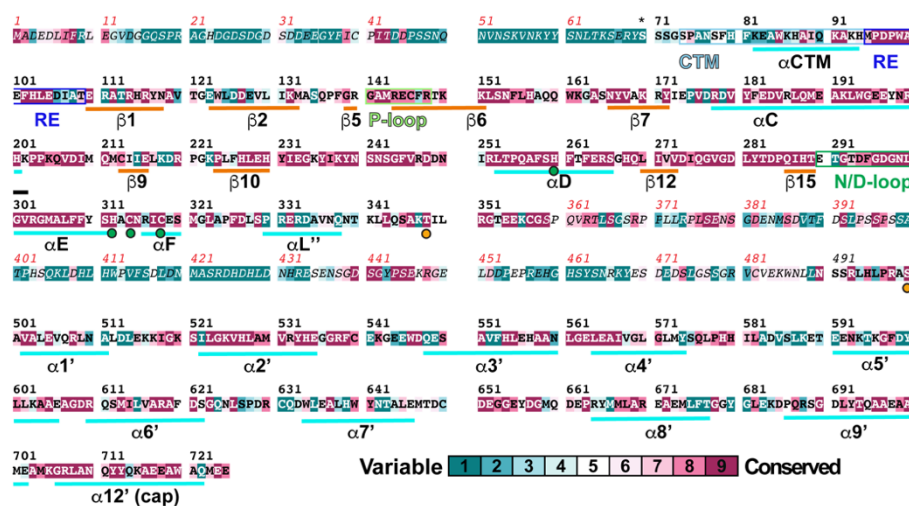

**Extended Data Fig. 1 Sequence conservation in eEF-2K.** Sequence conservation in eEF-2K was obtained using the ConSurf server with standard settings. Specific regions of secondary structure as determined by UCSF ChimeraX are indicated below the sequence; the location of the CaM-targeting motif (CTM, 74-95; previously known as the CaM-binding domain, CBD), regulatory element (RE, 96-109), P-loop (141-148) and N/D-loop (290-300, previously termed the G-loop), are also indicated. Labeling of the secondary structural elements for the KD (110-321) is based on that previously assigned to myosin heavy chain kinase A (MHCK-A). Green circles indicate residues H260, H312, C314, and C318 that coordinate the structural Zn<sup>2+</sup> found in all  $\alpha$ -kinases. The orange circles indicate the primary (T348) and secondary (S500) auto-phosphorylation sites. The secondary structural elements for the C-terminal domain (CTD, 502-725) are primed. The 359-489 segment of the R-loop (321-501) has been replaced by a 6-glycine linker in eEF-2K<sub>TR</sub> (previously called TR) that is also missing the first 69 residues of full-length eEF-2K; S70 (indicated by a ‘\*’) that is native in eEF-2K re-appears as a remnant of cloning. The residues present or absent in the eEF-2K<sub>TR</sub> construct compared to full-length eEF-2K are shown in bold or italicized fonts, respectively, with the corresponding sequencing numbering indicated in black or red font.

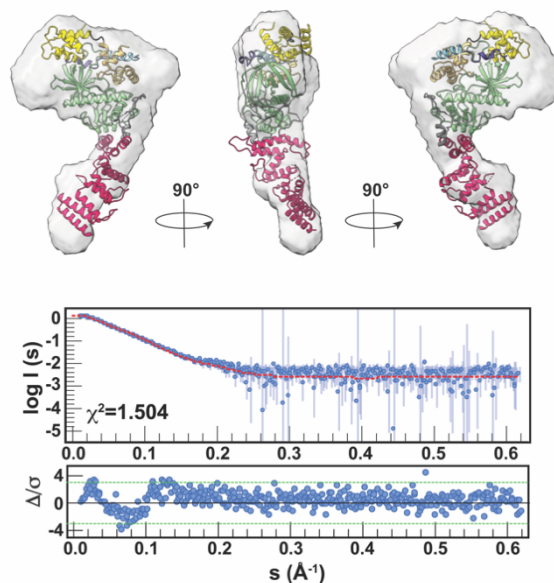

**Extended Data Fig. 2 The structure of the CaM•peEF-2K<sub>TR</sub> complex is consistent with solution scattering data.** The structure of the CaM•peEF-2K<sub>TR</sub> complex fitted into the molecular envelope of one of two dominant clusters calculated from small-angle X-ray scattering (SAXS) data acquired on a low-concentration sample of the CaM•eEF-2K<sub>TR</sub> complex (unphosphorylated T348). The corresponding experimental data (blue circles), the theoretical fit (red curve), and the reduced residuals ( $\Delta/\sigma$ ) are shown on the lower panel. While the SAXS-generated envelope reproduces the overall structural features in solution, the reduced residuals at low  $s$  values, and the relatively large  $\chi^2$  value, suggest differences between the molecular species. Some of these differences can be attributed to the fact that the SAXS data were acquired on the unphosphorylated complex in the presence of Ca<sup>2+</sup> but in the absence of Mg<sup>2+</sup>.



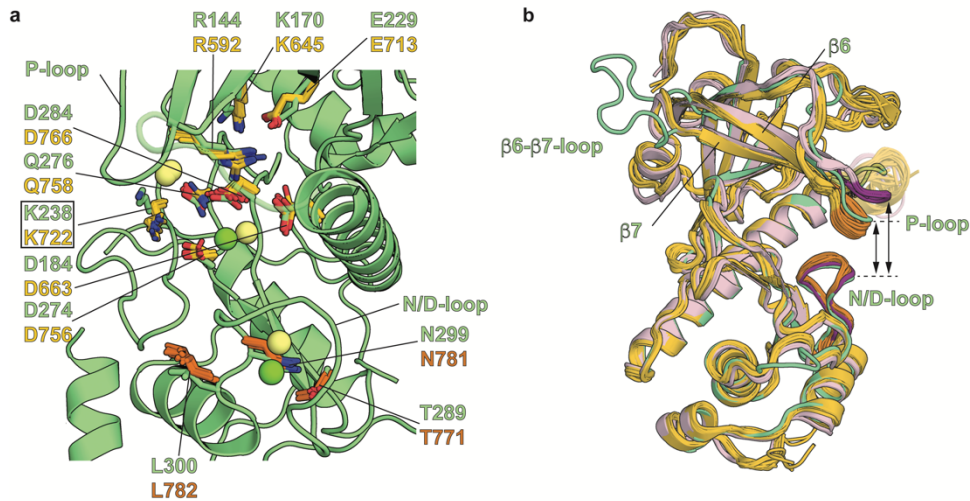

**Extended Data Fig. 3** *peEF-2K<sub>TR</sub>* is in an active state in the *CaM•peEF-2K<sub>TR</sub>* complex. **a**, Comparison of the orientations of key “catalytic” residues (in green) of the eEF-2K<sub>TR</sub> KD in the *CaM•peEF-2K<sub>TR</sub>* complex with corresponding residues (light orange) in several structures of the MHCK-A KD. R144 of eEF-2K<sub>TR</sub> (R592 in MHCK-A) coordinates the  $\alpha$ - and  $\beta$ -phosphates of ATP; K170 (K645) engages the  $\alpha$ -phosphate and the adenine ring; E229 (E713) engages the adenine amino group; K238 (K722) engages the  $\gamma$ -phosphate of ATP; D274 (D756) is the putative catalytic base, Q758 (Q276) and D284 (D766) coordinate the catalytic Mg<sup>2+</sup> ions and the  $\gamma$ - and  $\alpha/\beta$ -phosphates of ATP, respectively. While no density corresponding to a nucleotide was seen in the *CaM•peEF-2K<sub>TR</sub>* complex (crystallized in the presence of the slowly hydrolyzable ATP analog, AMP-PNP), all side-chains (except K238, indicated by the rectangle) are in similar orientations as their nucleotide-bound MHCK-A counterparts. The Mg<sup>2+</sup> ions seen in the structure of the *CaM•peEF-2K<sub>TR</sub>* complex are shown green, and those seen in the MHCK-A structures are shown in lime-green. Also shown (MHCK-A residues in orange) are the N/D-loop residues, T289 (T771), N299 (N781), and L300 (L782). N299 is stabilized through hydrogen bonds with the T289 side-chain and the D294 main-chain. This “asparagine-in” conformation has been suggested to be a characteristic of the active state of MHCK-A. In MHCK-A, N781 and L782 have been suggested to determine the accessibility of the active site. Given their similar spatial location and orientations, a similar role for the analogous N299 and L300 in eEF-2K<sub>TR</sub> can be envisaged. The conserved D766 in MHCK-A was phosphorylated in some of the structures. This phospho-aspartyl species has been proposed to represent an intermediate on the pathway to substrate phosphorylation. We do not find evidence of phosphorylation on the equivalent residue (D284) in eEF-2K<sub>TR</sub> in the *CaM•peEF-2K<sub>TR</sub>* complex. None of the MHCK-A structures used in the overlay contain *p*D766. **b**, Overlay of the KD of *peEF-2K<sub>TR</sub>* in the *CaM•peEF-2K<sub>TR</sub>* complex (green) and MHCK-A KDs in their nucleotide-bound (yellow) or nucleotide-free structures (pink) with the corresponding P- and the N/D-loops colored orange and magenta, respectively. A closed conformation of the P-loop relative to the N/D-loop in the presence of nucleotide is evident. This closed configuration is also seen for the eEF-2K<sub>TR</sub> KD in the *CaM•peEF-2K<sub>TR</sub>* complex. Also indicated for reference is the longer  $\beta 6$ - $\beta 7$ -loop of eEF-2K<sub>TR</sub> that contacts CaM<sub>N</sub> in the *CaM•peEF-2K<sub>TR</sub>* complex. The following MHCK-A structures were used in the analysis: for **a**, 5E9E (bound to AMP-PNP), 3LKM (bound to AMP), 3LMI (D766A mutant bound to ATP), 3LLA (bound to AMPPCP), and 4ZS4 (D756A mutant bound to ATP); for **b**, 3LLA, 3LMH (*p*D766, bound to ADP), 4ZS4, 3PDT



(C-terminally truncated bound to ADP), 3LKM, 5E9E, 5DYJ (D663A mutant bound to AMP), 4ZME (*p*D766, bound to adenosine), 4ZMF (*p*D766, bound to AMP), and 5E4H (apo) in **b**. Note that the only open conformation of the P-loop corresponds to the apo-enzyme (5E4H). In these structures, D663 was found to be phosphorylated. We do not find evidence of phosphorylation on the equivalent D184 in the structure of the CaM•*pe*EF-2K<sub>TR</sub> complex. Structural alignments were obtained using the DALI server.

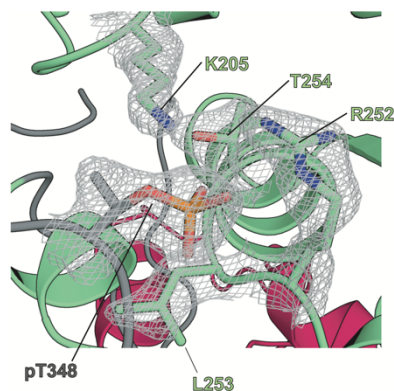

**Extended Data Fig. 4 T348 is phosphorylated in the CaM•peEF-2K<sub>TR</sub> complex.** 2Fo-Fc map contoured at 1.5σ, illustrating pT348 engaged at the PBP. The side-chains of key residues K205, R252, L253, and T254 are shown.

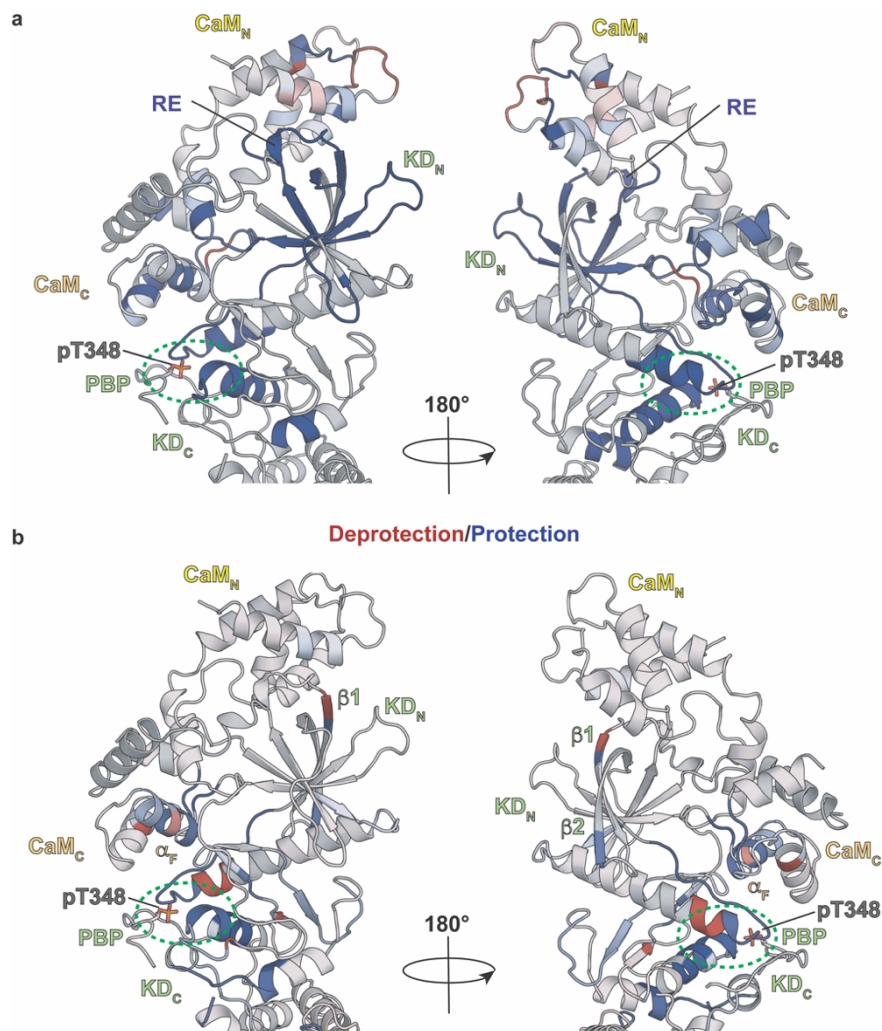

**Extended Data Fig. 5 HXMS measurements reveal changes in solvent protection upon complex formation and T348 phosphorylation.** **a**, Changes in solvent protection for the eEF-2K<sub>TR</sub> KD and CaM upon formation of the CaM•eEF-2K<sub>TR</sub> complex (unphosphorylated T348) from HXMS measurements, described previously, are plotted on the structure of the CaM•peEF-2K<sub>TR</sub> complex. Shades of blue or red indicate statistically significant increases or decreases in protection, respectively, upon complex formation. Increased protection is seen throughout CaM<sub>C</sub>, on KD<sub>N</sub>, including on the RE, and on KD<sub>C</sub> near the PBP (indicated by the green dashed oval). This suggests the intimate coupling of the structural dynamics of CaM<sub>C</sub> to key regulatory elements within the KD. Changes for CaM<sub>N</sub> are heterogeneous and more modest. **b**, Changes in solvent protection upon phosphorylation on T348 comparing the CaM•eEF-2K<sub>TR</sub> and CaM•peEF-2K<sub>TR</sub> complexes (shades of blue indicate increased protection upon phosphorylation on T348). Changes, in this case, are more local and seen at the PBP and on the proximal CaM<sub>C</sub>, especially on  $\alpha_F$ . Some isolated changes are also seen on KD<sub>N</sub> ( $\beta_1$  and  $\beta_2$ ).

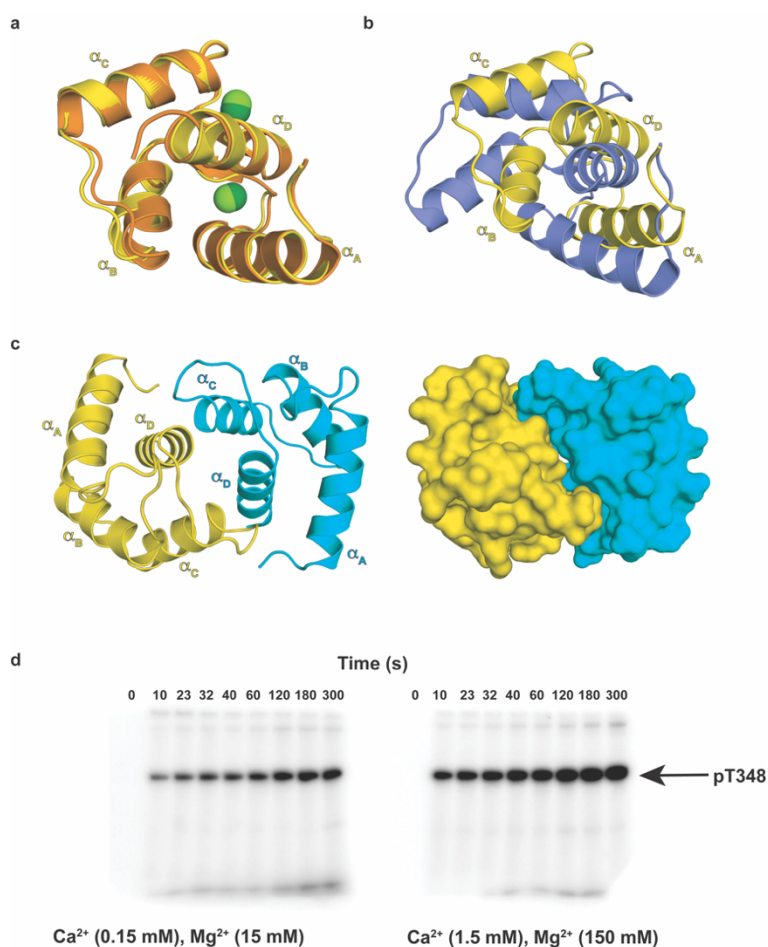

**Extended Data Fig. 6 CaM<sub>N</sub> adopts a closed conformation in the CaM•peEF-2K<sub>TR</sub> complex.**

**a**, Conformation of CaM<sub>N</sub> in the CaM•peEF-2K<sub>TR</sub> complex (yellow) or that bound to Mg<sup>2+</sup> (orange; PDB: 3UCW); the corresponding bound divalent cations are shown as light- or dark-green spheres. **b**, A comparison of the conformation of CaM<sub>N</sub> in the CaM•peEF-2K<sub>TR</sub> complex (yellow) with that in the NMR structure of the complex with CTM-pep in the presence of Ca<sup>2+</sup>. CaM<sub>N</sub> engages peEF-2K<sub>TR</sub> in an Mg<sup>2+</sup>-bound “closed” conformation rather than a Ca<sup>2+</sup>-bound “open” conformation as in the CTM-pep complex. The metal ions have been omitted for clarity. **c**, Interactions between two neighboring CaM<sub>N</sub> units related by symmetry within the crystal are shown as ribbons (left) or surfaces (right). The extensive crystal contacts involving α<sub>C</sub> and α<sub>D</sub> (the interactions with peEF-2K<sub>TR</sub> largely involve hydrophobic residues on α<sub>A</sub> and α<sub>B</sub>) suggest that this arrangement stabilizes the complex within the lattice. **d**, eEF-2K<sub>TR</sub> retains the ability to efficiently auto-phosphorylate on T348 under conditions where the Ca<sup>2+</sup> to Mg<sup>2+</sup> ratio (1:100) is similar to that used for crystallization. The time-courses for T348 auto-phosphorylation measured using two different sets of concentrations for Ca<sup>2+</sup> and Mg<sup>2+</sup> while holding their ratio constant are shown.

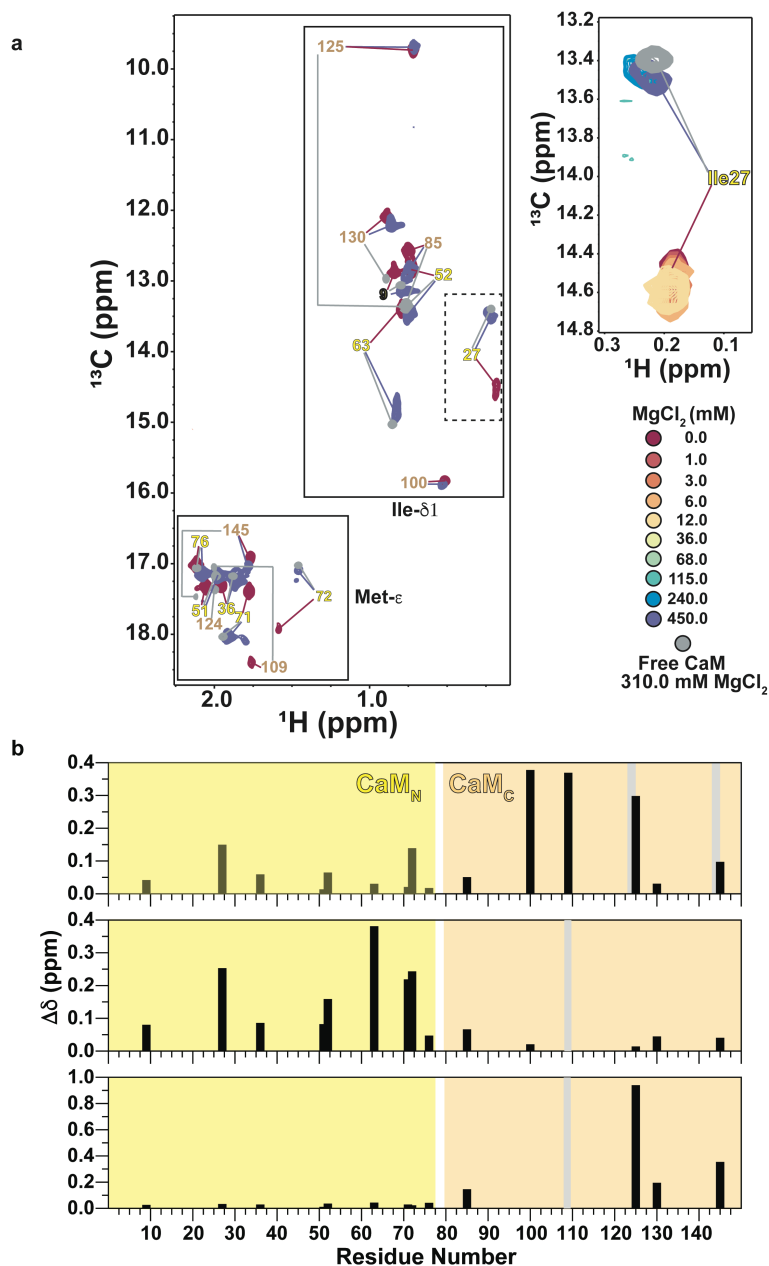

**Extended Data Fig. 7**  $\text{Mg}^{2+}$  partitions exclusively to  $\text{CaM}_N$  in the  $\text{CaM}\cdot\text{peEF-2K}_{\text{TR}}$  complex  
**a**, Overlays of  $^{13}\text{C}$ ,  $^1\text{H}$  HMQC spectra (800 MHz) of IM-labeled CaM in the  $\text{CaM}\cdot\text{peEF-2K}_{\text{TR}}$  complex in a buffer containing  $\text{CaCl}_2$  (300  $\mu\text{M}$ ) with varying concentrations of  $\text{MgCl}_2$ . The resonances of CaM alone in the presence of a saturating amount of  $\text{MgCl}_2$  are shown in grey for reference. The residues belonging to  $\text{CaM}_N$  or  $\text{CaM}_C$  are labeled in yellow and brown font, respectively. Only the initial (red, 0 mM  $\text{MgCl}_2$ ) and final (navy-blue, 450 mM  $\text{MgCl}_2$ ) points of the  $\text{Mg}^{2+}$  titration are shown on the left panel. The entire titration course for Ile27, a representative  $\text{CaM}_N$  resonance, is shown on the right panel. It is evident from the spectra that the  $\text{CaM}_N$  resonances converge to those of the  $\text{Mg}^{2+}$ -bound,  $\text{peEF-2K}_{\text{TR}}$ -free state at very high concentrations of  $\text{Mg}^{2+}$ . The perturbations experienced by the  $\text{CaM}_C$  resonances are significantly smaller, and they remain very close to their original positions even at 450 mM  $\text{MgCl}_2$ . For  $\text{CaM}_C$ , the only

apparent effect is seen for Met109 (at the CTM-binding pocket), which is progressively broadened and fully disappears at the highest  $\text{MgCl}_2$  concentration. Multiple exchange regimes are seen for the  $\text{CaM}_\text{N}$  resonances. Resonances whose initial and final positions in the  $\text{Mg}^{2+}$ -titration are separated by more than  $\sim 100$  Hz (e.g., Ile27, Met72) are in a slow exchange regime, suggesting that  $\text{Ca}^{2+}/\text{Mg}^{2+}$  exchange occurs on the ms timescale. **b**, Chemical shift perturbations induced by *peEF-2K<sub>TR</sub>* on IM-labeled CaM in the presence of  $\text{Ca}^{2+}$  (and the absence of  $\text{Mg}^{2+}$ ) are shown on the top panel. Fully broadened resonances are indicated by the grey bars. The largest perturbations are observed for  $\text{CaM}_\text{C}$ . The patterns of perturbations are similar to that reported by the presence of eEF-2K<sub>TR</sub> (unphosphorylated T348), suggesting that the CaM-recognition modes of eEF-2K<sub>TR</sub> and *peEF-2K<sub>TR</sub>* are similar in the two cases. Perturbations induced by  $\text{Mg}^{2+}$  (450 mM  $\text{MgCl}_2$ ) on IM-labeled CaM in the  $\text{CaM}\cdot\text{peEF-2K}_{\text{TR}}$  complex (containing 300  $\mu\text{M}$   $\text{CaCl}_2$ ) are shown on the middle panel. Significant perturbations are seen on  $\text{CaM}_\text{N}$ ; minimal perturbations are seen for  $\text{CaM}_\text{C}$  (except for the Met109 resonance that is broadened to below the noise). Perturbations in IM-labeled CaM comparing the  $\text{CaM}\cdot\text{peEF-2K}_{\text{TR}}$  complex in buffer containing 300  $\mu\text{M}$   $\text{CaCl}_2$  and 450 mM  $\text{MgCl}_2$ , with CaM alone in the presence of 310 mM  $\text{MgCl}_2$ , are shown on the bottom panel. The data suggest that, at high concentrations,  $\text{Mg}^{2+}$  replaces  $\text{Ca}^{2+}$  on  $\text{CaM}_\text{N}$ , leading to its disengagement from *peEF-2K<sub>TR</sub>*.

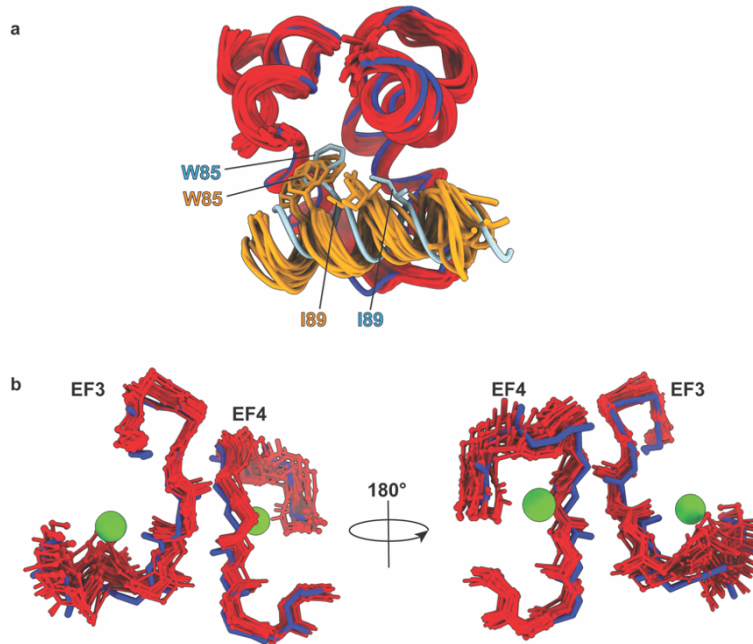

**Extended Data Fig. 8 The CaM<sub>C</sub>/CTM module adopts slightly different conformations in the *peEF-2K<sub>TR</sub>* and CTM-pep complexes.** **a**, Comparison of the CaM<sub>C</sub>/CTM modules in the NMR ensemble of the complex of CaM with CTM-pep (PDB: 5J8H) or in the CaM•*peEF-2K<sub>TR</sub>* complex. CaM<sub>C</sub> (CTM) is shown in red (orange) and dark-blue (light-blue) in the NMR and crystal structures, respectively. The CTM is displaced by approximately half a helical turn within CaM<sub>C</sub> in the crystal structure compared to the NMR ensemble. The W85 and I89 side-chains are shown for only 5 representative structures of the NMR ensemble for ease in visualization. The W85 side-chain occupies a similar spatial position, on average, in the crystal structure and the NMR ensemble. The orientation of the side-chains of I89 and A92 (hidden) are significantly different in the two cases. **b**, Backbone traces of the Ca<sup>2+</sup> binding EF-hands (EF3, EF4) of CaM<sub>C</sub> in the NMR ensemble (red) of the CaM•CTM-pep complex illustrate their displacement from the spatial position seen in the crystal structure of the CaM•*peEF-2K<sub>TR</sub>* complex (blue). These displacements make the CaM<sub>C</sub> EF-hands unsuitable for coordinating Ca<sup>2+</sup> in the CaM•CTM-pep complex.



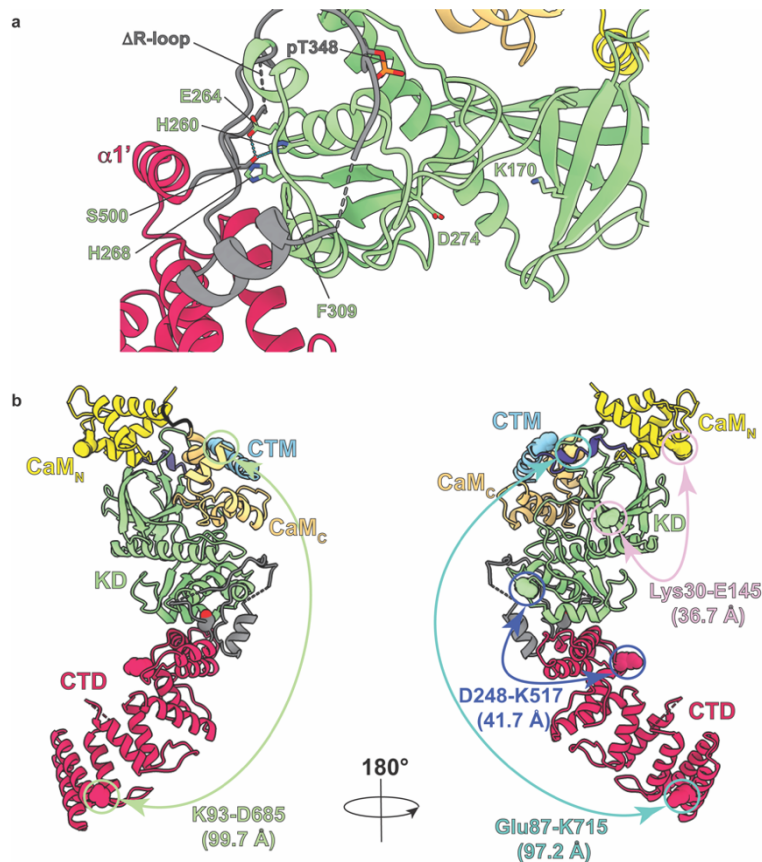

**Extended Data Fig. 9 Auto-phosphorylation on S500 requires conformational changes.** **a**, The secondary site of activating auto-phosphorylation (S500) is buried in a pocket within  $KD_C$ , being stabilized through hydrogen bonds involving the side-chains of the  $Zn^{2+}$ -coordinating H260, and E264, at a significant distance from the catalytic site (e.g., the  $S500, O\gamma$ -D274,  $O\delta 1$  and the  $S500, O\gamma$ -K170,  $N\zeta$  distances are 20.0 and 29.7 Å, respectively; D274 is the putative catalytic base) suggesting that auto-phosphorylation at this position *in cis* would require significant conformational rearrangements including a partial unfolding of  $\alpha 1'$ . Also shown for reference is the position of pT348 bound at the PBP. **b**, Unambiguous intermolecular (between CaM and eEF-2K<sub>TR</sub>) and intramolecular (CTM/CTD, KD/CTD) crosslinks assigned for the CaM•eEF-2K<sub>TR</sub> complex using the “zero-length” carbodiimide crosslinker EDC. While the two shorter  $C\alpha$ - $C\alpha$  distances could be accommodated within a 1:1 complex through conformational flexibility, the longer distances would require substantial structural distortions to enable close contact of the KD with the CTD, and of the CTD with CaM, as proposed in an earlier computational model. However, all these crosslinks would be compatible with a 2:2 complex with an antiparallel assembly of the constituent CaM•eEF-2K<sub>TR</sub> units. Such an arrangement would also facilitate *in trans* S500 auto-phosphorylation through smaller conformational changes. CaM and eEF-2K<sub>TR</sub> residues are indicated by three- and one-letter codes, respectively.



## Extended Data Table S1. Data collection and refinement statistics

| <b>Data Collection</b>               |                              |
|--------------------------------------|------------------------------|
| Beamline                             | NLSL-II BEAMLINe 19-ID       |
| Wavelength (Å)                       | 0.97946                      |
| Space Group                          | P3 <sub>1</sub> 21           |
| Cell dimensions:                     |                              |
| <i>a</i> , <i>b</i> , <i>c</i> (Å)   | 58.50 58.50 365.78           |
| α, β, γ (°)                          | 90 90 120                    |
| Resolution (Å)                       | 121.9 2.34<br>(2.382, 2.342) |
| R <sub>merge</sub>                   | 0.362 (1.778)                |
| <i>I</i> /σ( <i>I</i> )              | 14.5 (2.5)                   |
| Completeness (%)                     | 100 (100)                    |
| Redundancy                           | 25.9 (24.5)                  |
| Wilson B-factor                      | 14.99                        |
| Number of unique reflections         | 32010 (1494)                 |
| <b>Refinement</b>                    |                              |
| Resolution range (Å)                 | 50.66-2.34                   |
| No. reflections                      | 31982                        |
| R <sub>work</sub> /R <sub>free</sub> | 0.2293/0.2520                |
| Number of non-hydrogen atoms         |                              |
| Macromolecules                       | 5117                         |
| Ligands                              | 8                            |
| Solvent                              | 144                          |
| Protein residues                     | 637                          |
| RMS (bond) (Å)                       | 0.003                        |
| RMS (angles) (°)                     | 0.533                        |
| Ramachandran Plot                    |                              |
| Most favored (%)                     | 91.1                         |
| Additionally favored (%)             | 8.7                          |
| Generously favored (%)               | 0.2                          |
| Disallowed (%)                       | 0.0                          |
| Rotamer outliers (%)                 | 0.38                         |
| Clash-score                          | 4.29                         |
| Average B-factor (Å <sup>2</sup> )   | 35.37                        |
| Macromolecules                       | 35.6                         |
| Ligands                              | 29.35                        |
| Solvent                              | 27.61                        |
| PDB accession code                   | 7SHQ                         |

Values in parentheses are for the highest resolution shell.  $R_{\text{merge}} = \sum |I - \langle I \rangle| / \sum I$ , where *I* is the observed intensity.
